1  
2  
3  
4  
5  
6  
7  
8  
9  
10  
11  
12  
13  
14  
15  
16  
17

A feasibility study to test a novel approach to dietary weight loss with a focus on assisting informed decision making in food selection

Mindy H. Lee<sup>1</sup>, Catherine C. Applegate<sup>1</sup>, Annabelle L. Shaffer<sup>1</sup>, Abrar Emamaddin<sup>2</sup>,  
John W. Erdman Jr.<sup>1,2</sup>, Manabu T. Nakamura<sup>1,2\*</sup>

<sup>1</sup>Division of Nutritional Sciences, University of Illinois at Urbana-Champaign, Urbana, IL

<sup>2</sup>Department of Food Science and Human Nutrition, University of Illinois at Urbana-Champaign, Urbana, IL

\* Corresponding author

E-mail: [mtnakamu@illinois.edu](mailto:mtnakamu@illinois.edu)

## 1 **Abstract**

2 Obesity is a significant contributor to the development of chronic diseases, some  
3 of which can be prevented or reversed by weight loss. However, dietary weight loss  
4 programs have shortcomings in success rate and magnitude or sustainability of weight  
5 loss. The objective of the Individualized Diet Improvement Program (iDip) was to test  
6 the feasibility of a novel approach that helps individuals self-select a sustainable diet for  
7 weight loss and maintenance instead of providing weight loss products or rigid diet  
8 instructions to follow.

9 The iDip study consisted of 22 dietary improvement sessions over 12 months  
10 with six months of follow-up. Daily weights were collected, and a chart summarizing  
11 progress was provided weekly. Six 24-hour dietary records were collected, and dietary  
12 feedback was provided in the form of a protein-fiber plot, in which protein/energy and  
13 fiber/energy of foods were plotted two-dimensionally together with a target box specific  
14 to weight loss or maintenance. An exit survey was conducted at 12 months.

15 Twelve (nine female,  $46.3 \pm 3.1$  years (mean $\pm$ SE)) of the initial 14 participants  
16 ( $\text{BMI} > 28 \text{ kg/m}^2$ ) completed all sessions. Mean percent weight loss ( $n=12$ ) at six and 12  
17 months was  $-4.9\% \pm 1.1$  ( $p=0.001$ ) and  $-5.4\% \pm 1.7$  ( $p=0.007$ ), respectively. Weight loss  
18 varied among individuals at 12 months; top and bottom halves ( $n=6$  each) achieved -  
19  $9.7\% \pm 1.7$  ( $p=0.0008$ ) and  $-1.0\% \pm 1.4$  weight loss, respectively. The 24-hour records  
20 showed a significant increase in protein density from baseline to final ( $4.1\text{g}/100\text{kcal} \pm 0.3$   
21 vs.  $5.7\text{g}/100\text{kcal} \pm 0.5$ ;  $p=0.008$ ). Although mean fiber density showed no significant  
22 change from the first month ( $1.3\text{g}/100\text{kcal} \pm 0.1$ ), the top half had significantly higher

23 fiber/energy intake than the bottom half group. The survey suggested that all  
24 participants valued the program and its individualized approach.

25 In conclusion, half of the participants successfully lost >5% and maintained the  
26 lost weight for 12 months without strict diet instructions, showing the feasibility of the  
27 informed decision-making approach.

28

## 29 **Introduction**

30 With the advancement of food production globally, obesity has become a  
31 worldwide epidemic, increasing the risk of morbidity and mortality [1, 2]. In the United  
32 States, 70.2% of adults are obese (body mass index, BMI>30 kg/m<sup>2</sup>) or overweight  
33 (BMI>25 kg/m<sup>2</sup>), with 7.7% having extreme obesity (BMI>40 kg/m<sup>2</sup>) [3]. Overweight and  
34 obesity are risk factors for several comorbidities, including type 2 diabetes mellitus,  
35 cardiovascular disease, and cancers. Based on 2013 US medical spending, obesity and  
36 its complications cost \$342.2 billion annually (28.2% of all medical expenditures) [4].  
37 Modest weight losses of 3-5% initial body weight are capable of lowering blood  
38 triglycerides, fasting blood glucose, and improving glycemic control. Further weight  
39 losses enhance these benefits, and can also reduce blood pressure, cholesterol, and  
40 need for medications [2, 5].

41 Currently available weight loss methods do not reliably achieve medically  
42 significant weight loss as they are insufficient in success rate, sustainability, or  
43 magnitude of weight loss. Exclusion of certain food groups is a common approach of  
44 popular dieting programs, which can result in some weight loss, but high attrition rates  
45 often result due to a lack of dietary adherence [6-8]. For example, commonly used

46 dieting programs, including Atkins (carbohydrate restriction), Zone (substituting  
47 carbohydrate with protein), and Ornish (reduction of animal foods), can induce modest  
48 weight losses of <5 kg but lack a high success rate and long-term sustainability [9-12].  
49 Participants grow fatigued of the strict recipes and are unable to adapt the plan to their  
50 daily lives [13, 14]. This translates to low adherence, unsuccessful weight loss, and lack  
51 of diet sustainability.

52 Negative energy balance is a requirement for weight loss. Calorie monitoring is  
53 often proposed to achieve this and is recommended by health professionals [15, 16].  
54 However, it is laborious and frequently inaccurate [17, 18]. Often, programs utilizing  
55 calorie counting or food journals lead to high attrition and thus, insignificant long-term  
56 weight loss [19-21]. More importantly, the protein requirement increases during periods  
57 of negative energy balance compared with the requirement during weight maintenance  
58 [22, 23]. Focusing only on energy reduction may result in exacerbating the loss of lean  
59 body mass and decreased efficiency in weight loss [23].

60 Successful, clinically significant weight losses can be achieved using meal  
61 replacement products; however, weight maintenance remains a substantial challenge  
62 for this approach [5]. Very-low-calorie diets (VLCD) in the form of meal replacements  
63 have shown clinically significant weight loss in the short term, but VLCD participants are  
64 less successful in weight maintenance compared to a restricted-energy whole-food diet  
65 [24-26]. Even when a VLCD was combined with intensive dietary and lifestyle  
66 intervention programs using counseling, education, and exercise, participants regained  
67 most or all of the lost weight during the follow-up periods [5, 27].

68 Pharmaceuticals are available for treating obesity, such as orlistat and

69 phentermine/topiramate, and work by reducing fat absorption and suppressing appetite,  
70 respectively. However, these medications result in only 3-6% weight loss and can  
71 include several side effects such as reduced fat-soluble vitamin absorption or  
72 gastrointestinal upset [28]. As a result of the low efficacy in medicine and lifestyle  
73 interventions, bariatric surgery remains the most reliable weight loss treatment and can  
74 reduce obesity complications, such as hyperglycemia [29]. Bariatric surgery does have  
75 significant drawbacks, including a mean cost of \$14,389 per surgery, surgical  
76 complications, nutritional deficiencies, and the need for drastic dietary changes [30].

77 In summary, although dietary weight loss can treat comorbidities associated with  
78 obesity, existing programs have shortcomings in sustainability, magnitude, adherence,  
79 and success rate. As such, a dietary weight loss program that can be used as a reliable  
80 treatment option is yet to be developed. Thus, we tested the feasibility of an innovative  
81 approach to dietary weight loss that aims to overcome the aforementioned challenges.  
82 First, we employed an approach to increase nutritional knowledge that allows  
83 participants to create their own weight loss diet by making informed food choices that  
84 enables participants to individualize their diet based on their preferences. To help this  
85 process, we used the Protein-Fiber (PF) plot (Fig 1) developed by our group [31] to  
86 provide participants with a visual and quantitative feedback. This individualized self-food  
87 selection aided by the PF plot replaced traditional weight loss approaches such as  
88 exclusion of certain food groups from diet, provision of strict meal plans to follow and  
89 use of dieting products because these short-term approaches likely limits the success in  
90 long term. Second, we used the PF plot for participants to create a weight-loss diet with  
91 increased protein while reducing the overall energy intake to meet an increased protein

92 requirement during weight loss. Finally, we replaced calorie counting/food journaling  
93 with daily weight monitoring and provision of a weekly progress chart to monitor energy  
94 balance.

## 95 **Materials and methods**

96 This study was approved by the University of Illinois Institutional Review Board  
97 (#18069) on August 30<sup>th</sup>, 2017. The study was registered at the US National Institutes  
98 of Health (ClinicalTrial.gov) #NCT04605653. Registration was delayed due to lack of  
99 knowledge. The authors confirm that all ongoing and related trials for this intervention  
100 are registered. Participant recruitment started on September 1<sup>st</sup>, 2017, and the follow-up  
101 period ended on July 28<sup>th</sup>, 2018. Informed consent was obtained from all participants  
102 included in the study.

### 103 **Participant recruitment**

104 Adults who were 18 to 64 years old and with a BMI  $>28 \text{ kg/m}^2$  were recruited via  
105 posters, flyers, and word of mouth in Urbana-Champaign, Illinois, USA, and surrounding  
106 regions from September 2017 through January 2018. A power calculation was  
107 performed using an average standard deviation 7.0 for % weight loss at 12 months from  
108 similar dietary weight loss studies [32]. We set 5% weight loss as a primary outcome to  
109 be detected. The minimum sample number required with 95% confidence interval was  
110 7.5. With  $n=10$ , we will be able to detect 5% difference when actual SD is 8.0.  
111 Alternatively, we will be able to detect 4.3% difference if SD is 7.0 as estimated. Based  
112 on a mean attrition rate of 22.1% from 60 studies [33], we recruited 14 participants  
113 assuming 30% attrition rate.

114 Inclusion criteria in addition to age and BMI were access to Wi-Fi at home,  
115 working email and smartphone, fluent English communicator, and willingness to self-  
116 weigh daily with a provided Wi-Fi scale for a minimum of 18 months. Exclusion criteria  
117 were the following: adults with self-reported severe metabolic, cardiovascular or  
118 musculoskeletal disease, insulin use, pregnancy, planned pregnancy, or lactating; or  
119 unwillingness to attend any of the educational sessions. Among eligible applicants,  
120 invitation was prioritized to best reflect the gender and racial composition of the  
121 community. Selected applicants were invited for an individual meeting for an additional  
122 screening process. After receiving explanations about the study, a Food Frequency  
123 Questionnaire (FFQ) was administered, and anthropometric measurements were  
124 collected. Informed consent was obtained, and a Wi-Fi scale was provided. Other than a  
125 Wi-Fi scale, no monetary compensation was provided to the participants for  
126 participating in the study.

## 127 **Study design**

128 The iDip study utilized a non-randomized, non-controlled, before-and-after study  
129 design with a cohort of participants and comprised of 12 months of intervention followed  
130 by six months of follow-up. The iDip consisted of four weekly sessions (month one), 12  
131 biweekly sessions (months two-six), and six monthly sessions (months seven-12).  
132 Nineteen 60-minute group-based diet improvement sessions and three 30-minute  
133 individual advising sessions were delivered by registered dietitians at the University of  
134 Illinois at Urbana-Champaign. Each group session focused on knowledge and skill-  
135 building activities to make informed food selections. Weekly sessions in month one  
136 focused on the basic strategy of weight loss; bi-weekly sessions in months two-six

137 focused on protein, fiber, physical activity, weight loss plateauing, and weight  
138 maintenance; and months seven-12 of monthly sessions focused on healthy eating and  
139 micronutrients beyond weight management (S1 Appendix). All participants received two  
140 types of feedback: 1) weekly weight chart; and 2) PF plot of their 24-hour diet record  
141 analysis at one, two, three, five, seven and 12 months to assist individuals in monitoring  
142 their weight and dietary pattern. PF plot was the sole diet feedback and analysis that  
143 participants received. No dieting products nor recipes were distributed. Weight and  
144 dietary changes were evaluated during individual sessions, and participants were  
145 advised according to their needs.

## 146 **Development of novel learning tools**

### 147 **A quantitative nutrient display method**

148 The PF plot (Fig 1) is a two-dimensional display of quantitative nutrition  
149 information designed to improve food selection and understanding of protein and  
150 fiber density of foods [31]. Protein and fiber are critical nutrients for weight  
151 management as adequate protein intake protects muscle mass from degradation  
152 during weight loss [22, 34], and consuming sufficient protein and fiber decreases  
153 excessive calorie consumption [35-37]. The fat to carbohydrate ratio was  
154 disregarded in this study as previous randomized-controlled trials have not shown  
155 that long-term weight loss favors a low-carbohydrate and high-fat diet or vice versa  
156 [38-40].

157 Protein and fiber targets of the PF plot are derived from the Acceptable  
158 Macronutrient Distribution Ranges (AMDR) and Adequate Intakes (AI) for weight  
159 maintenance in adults, respectively, as previously described [31]. Briefly, for



160 protein, the AMDR is 10-36% daily intake; and for fiber, the AI is 14 g/1000 kcal  
161 daily [15]. For the weight maintenance box (blue): using 16-32% kcals from  
162 protein, we set 4-8 g/100 kcal as protein target; and for fiber, 1.4-2.8 g/100 kcal  
163 (Fig 1). The weight loss target (green) was set assuming a caloric reduction of  
164 minimum 25% of the daily requirement as weight loss requires a negative energy  
165 balance. By adjusting for 25% calorie reduction and 1.25x increase in protein  
166 requirement [22, 23], we set a protein range for weight loss of 7-11 g/100 kcal.  
167 Using 14 g fiber/1000 kcals and factoring 25% reduction of caloric intake, the  
168 resulting range was set as 1.8-3.2 g/100 kcals (Fig 1).

169  
170 **Fig 1. Protein and fiber plot with example food items.** Foods with green dots are  
171 dense in protein or fiber and can be easily fit in the target box when combined, whereas  
172 foods with red dots cannot be due to low protein and fiber densities. A yellow food has  
173 protein and fiber density between green and red foods. A blue dot with a shadow  
174 shows where a meal falls when all foods are combined. Blue box, weight maintenance  
175 target; green box, weight loss target.

## 176 177 **Energy balance monitoring**

178 In the iDip, calorie counting and daily food journaling were replaced with daily  
179 self-weighing and weekly progress summary charts to monitor energy balance. As  
180 mentioned in the Introduction, calorie counting and food log methods are conventional  
181 in weight management, but these methods are time-consuming and prone to error,  
182 resulting in high attrition rates [19-21]. Daily self-weighing using a Wi-Fi-enabled scale

183 (Weight Gurus, Greater Goods LLC, MO) provided a reliable energy balance estimation  
184 that requires little time. Participants were provided with a weekly weight feedback chart  
185 showing weight, a six month goal weight and an intended weight loss rate in the format  
186 shown in Fig 2.

187  
188 **Fig 2. A weekly weight chart feedback.** The red line represents the target weight  
189 loss slope (1 lb. loss per week) over time, the blue line represents actual daily weights,  
190 and the green line represents the target of 25 lbs. (11.3 kg) weight loss (based on a six  
191 month weight loss goal of 1 lb. loss per week).

192

## 193 **Outcome measures**

### 194 **Anthropometrics measures**

195 Anthropometrics measurements were the primary outcomes, and entailed height,  
196 weight, waist, and hip circumferences. These were obtained at baseline and at 12  
197 months. Height was recorded to the nearest 0.25 inches with shoes removed via  
198 stadiometer (Seca 700, Hanover, MD), and weight was measured to the nearest 0.1 lbs  
199 in light clothing on the same instrument. BMI was calculated using measured height and  
200 weight. In addition, weights were monitored and obtained daily via a Wi-Fi scale. Waist  
201 and hip circumferences were measured using a Retractable Tape Measure (Gulik II,  
202 Gay Mills, WI) and recorded to the nearest 0.1 cm. Waist to hip ratio was obtained  
203 based on measured waist and hip circumferences.

## 204 **Dietary assessment**

205 Dietary changes were the secondary outcomes assessed in this study. A paper  
206 version of the validated EPIC-Norfolk FFQ questionnaire (S2 Appendix) was used at  
207 baseline and at 12 months to assess dietary patterns [41]. Twenty-four-hour dietary  
208 records were administered at one, two, three, five, seven and 12 months to evaluate  
209 dietary changes. The results were returned to the participants in the form of a PF plot.  
210 The US Department of Agriculture National Nutrient Database for Standard Reference  
211 (<https://fdc.nal.usda.gov/>) and manufacturer information were used to calculate protein  
212 and fiber density.

## 213 **Survey measures**

214 An exit survey was conducted at the end of the 12 month intervention. A  
215 questionnaire containing 14 items was developed to explore personal gain, program  
216 content, program materials and feedback, engagement, and overall evaluation of the  
217 program. Possible responses for each question were “Definitely Yes,” “Yes,” “A little bit,”  
218 “Neutral,” “Not really,” “No,” “Definitely Not.” A score was provided for each response  
219 from one to seven, with seven being “Definitely Yes”.

## 220 **Data analysis**

221 Descriptive analysis was used to summarize demographic characteristics.  
222 Weight loss of  $\geq 5\%$  from the baseline was considered meaningful as it has been shown  
223 to reduce risks associated with obesity [42]. Paired t-test analysis determined the pre-  
224 and post-intervention differences in outcome measures for the program completers.  
225 Pearson correlation analyses were performed to determine associations between body  
226 weight, protein density, and fiber density. Cohen’s d was computed by single sample z-

227 test. Normality of data was tested using Shapiro-Wilk. Repeated measure ANOVA was  
228 used to compare 24-hour dietary records. All statistical analyses were performed using  
229 Microsoft Office Excel 2016 and R Computing (Version 3.6.1 © 2019), and  $p < 0.05$  was  
230 considered statistically significant.

## 231 **Results**

### 232 **Participant characteristics**

233 A flow diagram of participant enrollment is shown in Fig 3. Fourteen participants  
234 started the study. The mean age was  $44.6 \pm 3.0$  years, and mean BMI was  $36.7 \pm 1.7$   
235  $\text{kg/m}^2$ . The demographics and characteristics of participants are presented in Table 1.  
236 Enrolled participants had medical histories of hypertension (36%), hypercholesterolemia  
237 (21%), thyroid issues (21%), skeletal problems (14%), sleep apnea (14%), and  
238 hyperlipidemia (7%). Participants had prior dieting experiences including Weight  
239 Watchers (71%), Jenny Craig (14%), liquid diets (14%), Ideal Protein (14%), low  
240 carbohydrate (14%), South Beach (7%), low fat (7%), low calories (7%), cabbage soup  
241 diet (7%), Atkins (7%), 21-day fix (7%), Human Chorionic Gonadotropin (HCG) diet  
242 (7%), and Transformation diet (7%). No significant differences were found in any  
243 demographic data between top and bottom groups in weight loss.

244

245 **Fig 3. Flow diagram of the participants**

246

247 **Table 1. Demographic data of participants**

|                          | <b>Enrollees (%)</b><br>N=14 | <b>Completers (%)</b><br>N=12 |
|--------------------------|------------------------------|-------------------------------|
| <b>Age in years</b>      |                              |                               |
| 18-34                    | 14.3                         | 8.3                           |
| 35-50                    | 50.0                         | 50.0                          |
| 51-65                    | 35.7                         | 41.7                          |
| <b>Gender</b>            |                              |                               |
| Male                     | 21.4                         | 25.0                          |
| Female                   | 78.6                         | 75.0                          |
| <b>Marital Status</b>    |                              |                               |
| Married                  | 64.3                         | 75.0                          |
| Single                   | 35.7                         | 25.0                          |
| <b>Ethnicity</b>         |                              |                               |
| White                    | 57.1                         | 50.0                          |
| African American         | 42.9                         | 50.0                          |
| <b>Educational level</b> |                              |                               |
| Graduate degree          | 50.0                         | 58.3                          |
| Bachelor's degree        | 42.9                         | 41.7                          |
| High school              | 7.1                          | 0.0                           |

248

249 **Table 2. Characteristics of participants who completed dietary improvement**  
250 **sessions**

|                               | <b>Baseline (n=12)</b> | <b>6 months (n=12)</b> | <b>12 months (n=12)</b> | <b>Follow-up (n=6)</b> |
|-------------------------------|------------------------|------------------------|-------------------------|------------------------|
| <b>Height (cm)</b>            | 167.4±1.2              | 167.4±1.2              | 167.4±1.2               | 166.5±1.3              |
| <b>WC (cm)</b>                | 112.9±1.               |                        | 109.9±1.5(0.18)         |                        |
| <b>HC (cm)</b>                | 125.5±1.2              |                        | 123.5± 1.6(0.45)        |                        |
| <b>WHR</b>                    |                        |                        |                         |                        |
| <b>Female</b>                 | 0.88±0.02              |                        | 0.85±0.02(0.17)         |                        |
| <b>Male</b>                   | 1.00±0                 |                        | 0.98±0.04(0.54)         |                        |
| <b>Weight (kg)</b>            | 103.3±6.5              | 98.1±6.2(0.001)        | 98.4±7.4(0.007)         | 98.2±11.9(0.07)        |
| <b>BMI (kg/m<sup>2</sup>)</b> | 36.7±1.7               | 34.9±1.7(0.001)        | 34.9±2.0(0.007)         | 35.0±2.9(0.07)         |

251 Values are presented as mean±SE for baseline and mean±SE (p-value) for  
252 subsequent months. P-values by paired t-test are shown in parenthesis. WC: Waist  
253 circumference, HC: Hip circumference, WHR: Waist to hip ratio

254

## 255 Retention

256 Fourteen participants started the program. Participants who were unable to  
257 attend the regular sessions received make-up sessions. One participant dropped out  
258 after four weeks, and the other participant dropped out after eight weeks, yielding 85.7%  
259 retention. The reasons for leaving the study were as follows: too busy to focus on  
260 weight loss (n=1) and unsatisfying weight loss (n=1). During the follow-up period, six out  
261 of 12 participants continued to weigh daily.

## 262 Change in anthropometric measures

263 Anthropometric changes following the intervention are presented in Table 2 and  
264 Figures 4 and 5. At 12 months, six participants (50%) successfully lost >5% of their  
265 initial body weights (Fig 4). Of the unsuccessful participants (n=6), four participants did  
266 not reach 5% weight loss during the 12 months, whereas two participants regained lost  
267 weight after six months (Fig 4). On average, participants (n=12) achieved a significant  
268 weight loss of  $-5.4\% \pm 1.7\%$  at 12 months ( $p < 0.01$ ) from the baseline (Fig 5). Cohen's d  
269 for 12 month weight loss was -0.21 indicating a small, negative change in weight. A  
270 large difference in weight loss outcome was observed among participants at 12 months  
271 ( $p < 0.001$ ); the top half (n=6) showed a significant loss from the baseline reaching -  
272  $9.7 \pm 1.7\%$ , whereas the bottom half (n=6) lost  $-1.0 \pm 1.4\%$  (Fig 5). The difference between  
273 the two groups widened as time progressed from the start to 12 months, particularly  
274 during the last five months (Fig 5).

275

276 **Fig 4. Weight changes (%) of each participant at six, 12, and 18 months.** The data  
277 are ordered by magnitudes of weight loss at 12 months.

278 **Fig 5. Weight changes (%) of all, top-half and bottom-half groups over 12 months.**

279 Participants were divided into two groups of equal size (n=6 each) based on the weight  
280 changes from baseline at 12 months. \*\*p<0.01, \*\*\*p<0.001 at 12 months compared with  
281 baseline.

282

283 **Change in dietary components**

284 Changes in diets over 12 months based on FFQ and 24-hour dietary records are  
285 shown in Fig 6. A significant increase in fiber density (p=0.02) but not protein density  
286 was found from the FFQ. Twenty-four-hour records showed a significant improvement in  
287 protein density in all 5 subsequent records when compared with the first month record,  
288 whereas fiber density increased only at three months (p=0.02). Next, 24-hour records  
289 were compared between the groups of the bottom and top half in weight loss at 12  
290 months (Fig 7). While only one out of six records of the bottom half was inside the  
291 weight maintenance box, four out of six records of the top half stayed within the weight  
292 maintenance box. A significant difference in fiber density was observed between the top  
293 half and bottom half (p=0.04) although there was no difference in protein density  
294 (p=0.19) (Fig 7). There was no significant difference in protein density between the two  
295 groups at any time point.

296

297 **Fig 6. Changes in protein and fiber density of the whole group assessed by FFQ**  
298 **and 24-hour records.** Data are presented as mean. FFQ were collected at the baseline  
299 (n=12) and the end of the trial (n=11). Twenty-four-hour records were collected at one –  
300 seven months (n=12) and at 12 months (n=10). Changes in protein density and fiber

301 density were compared between baseline and 12 months in FFQ, and between the first  
302 month and two-12 months in 24-hour records. \* $p=0.02$ , \*\*\* $p<0.001$  in protein density;  
303  $\S p=0.02$  in fiber density by paired t-test.

304 **Fig 7. Changes in protein and fiber density of top and bottom half groups in**  
305 **weight loss at 12 months.** 24-hour records conducted at one, two, three, five, seven  
306 and 12 months. Dietary records were divided to two groups based on top half ( $n=6$ ) and  
307 bottom half ( $n=6$ ) of weight loss at 12 months. Data are presented as mean.  $\S p=0.04$   
308 significant difference in fiber density between two groups by repeated measure ANOVA  
309 when all time points of 24-hour records were combined ( $n=35$  for each group).

310

### 311 **Correlation among weight loss and protein and fiber density**

312 Correlations between diet and weight changes were tested to identify possible  
313 determinants of weight loss success (Fig 8). A significant correlation was found between  
314 weight loss at three months and weight loss at 12 months, suggesting participants who  
315 lost weight during the initial three months continued to lose more ( $p=0.03$ ,  $r_p=0.64$ ). A  
316 positive correlation was observed between protein and fiber densities at three months  
317 ( $p=0.02$ ,  $r_p=0.64$ ). A positive correlation between protein density at three months and its  
318 density at six months was also observed ( $p=0.002$ ,  $r_p=0.80$ ). No significant associations  
319 were found between weight loss and either protein or fiber density at any months tested.

320

321 **Fig 8. Correlation matrix showing the interrelationship among weight loss and**  
322 **protein and fiber density at three months, six months, and 12 months.** Positive  
323 correlations are displayed in blue and negative correlations in red. \* $p<0.05$ , \*\* $p<0.01$ .



324

## 325 **Exit survey**

326           The results of the exit survey at 12 months are shown in S3 Appendix. Questions  
327 one and three suggested that participants who completed the program found it  
328 beneficial for applying skills such as interpreting nutrition information to maintain  
329 healthier eating behaviors. A high score was received in program content with  
330 instructors being knowledgeable (question 5) and available to offer support (question 8).  
331 Finally, participants reported that the visual feedbacks, including the PF plot and weekly  
332 weight chart, were easy to understand and helpful (questions 9 and 10). The overall  
333 findings from the survey suggested that iDip equipped participants with valuable  
334 nutrition knowledge and skills, which enabled some individuals to adhere to dietary  
335 changes. However, the scores of questions 2 and 11 showed that the program was  
336 lacking in some aspects of satisfaction in overall engagement and individual goal  
337 achievements.

## 338 **Discussion**

339           This study demonstrated the feasibility of a novel and innovative weight loss  
340 program that utilized two key visual feedback systems: the PF plot and the weekly  
341 weight chart. These quantitative feedbacks allowed participants to self-select dietary  
342 modifications. iDip uniquely used no calorie counting, meal plans or recipes, meal  
343 replacements, or food exclusions. At 12 months, 50% of participants achieved >5%  
344 weight loss, and a retention rate of 85.7% was achieved.

## 345 **Innovations**

346 iDip was formulated to reduce attrition rates and increase dietary flexibility, two  
347 critical shortcomings of many existing weight loss programs. To increase dietary  
348 flexibility, iDip provided nutrition education and individualized PF plot feedback to  
349 empower participants to develop a weight loss diet suitable to their taste preferences  
350 and lifestyle. Participants were able to create and advance a weight loss diet based on  
351 the PF plot. Participants were not given specific meal plans, meal replacement products,  
352 or recipes; rather, all dietary modifications were selected and implemented by  
353 individuals with guidance from individual counseling and educational sessions.  
354 Importantly, no macronutrient or food group was excluded or limited in contrast to the  
355 practice commonly used in dieting programs, such as the Atkins diet. Also, iDip did not  
356 place any focus on the fat and carbohydrate ratios in a diet as modifying fat and  
357 carbohydrate ratios has been reported to be ineffective for long-term weight loss [10,  
358 13]. Participants were encouraged to self-select to limit intake of foods that contain  
359 minimal fiber and protein, but they were not instructed to exclude any particular foods  
360 from their diet. Thus, all diets and macronutrient distributions differed by participants.

361 The individualized PF plot played a critical role in dietary improvement and  
362 allowed participants to use the knowledge gained from education sessions to self-  
363 select foods to increase or decrease. Previously in a 12-week university cafeteria  
364 study, we tested if providing nutrient information in a PF plot format could assist  
365 customers in making an informed, healthier choice [31]. In the study, no  
366 nutritional information was provided during weeks one – three and seven – nine,  
367 and a Nutrition Facts Panel and a PF plot were posted on identical menu items,

368 during weeks four – six and weeks 10-12, respectively. Sales data, the primary  
369 outcome, showed that when the PF plot was displayed, the protein content and  
370 protein + fiber content of purchased meals was significantly higher than no  
371 posting periods, whereas the Nutrition Facts Panel had no effect. These results  
372 have shown the PF plot's ease of understanding and its ability to improve  
373 consumer food choices [31]. In the current study, we have demonstrated that the  
374 PF plot can also be used in a weight loss program to help participants create their  
375 weight loss diet. Survey outcomes showed iDip participants appreciated the PF  
376 plot for its clear, quantitative food information to help guide food selection instead  
377 of vague information about food groups.

378 iDip utilized daily self-weighing on a Wi-Fi-enabled scale to provide easy and  
379 reliable energy balance monitoring without calorie counting or daily food journals. Self-  
380 monitoring is a critical factor in behavior changes for weight loss [43, 44]. Bertz et al.  
381 showed daily self-weighing and weekly summary feedback can limit weight gain [45].  
382 We provided a cumulative weight loss progress chart every week, eliminating the need  
383 for calorie counting entirely and providing means for self-monitoring. The purpose of the  
384 six 24-hour records administered was to evaluate progress in dietary improvement, not  
385 to monitor energy balance.

386 iDip had a retention rate of 85.7%, indicating likeability of our program and its  
387 flexible dietary approach. This high retention was achieved without monetary  
388 compensation. Participants were given the Wi-Fi scale (value ~ \$60) to keep after  
389 completing the study. The dietary flexibility, self-selection of foods, and no need for daily  
390 calorie counting likely contributed to the low attrition.

## 391 **Limitations**

392           We chose the minimum number of participants to achieve the study objective of  
393 testing the feasibility of a novel dietary weight loss approach, not to test the robustness  
394 of the program as a clinical treatment option. Despite achieving a clinically significant  
395 mean percent weight loss of >5%, we observed some limitations. First, a success rate  
396 of 50% of participants achieving >5% weight loss at 12 months is not sufficient to be  
397 used as a reliable treatment program. Also, a greater magnitude of weight loss will be  
398 needed for iDip to become a clinical treatment option. Second, the follow-up period (six  
399 months) was too short to assess long-term sustainability. At 18 months, 50% of the  
400 cohort was lost to follow-up and were no longer weighing regularly, suggesting that half  
401 of the participants regarded daily weighing as a requirement of the program, not an  
402 essential part of weight management. Among the remaining participants, not all were  
403 successful in maintaining their weight between 12 and 18 months, indicating the dietary  
404 changes made during the program were not sustained in some. iDip aimed to improve  
405 long-term sustainability through non-exclusion of certain food groups and self-selected  
406 approach; thus, future studies will include a longer follow-up period with better  
407 implementation of sustainable dietary changes and daily weighing for monitoring energy  
408 balance. Third, body composition changes were not measured or tracked throughout  
409 the study. However, with the focus on increased protein density, we expect little muscle  
410 mass loss. Lastly, changes in health parameters, such as blood lipid and glucose levels  
411 and changes in medications associated with obesity and other comorbidities, were not  
412 tracked.

## 413 **Future directions**

414 This study showed proof of concept for the non-exclusion of certain food groups  
415 and self-selected approach to dietary weight loss. Based on this success, steps of  
416 future studies will include: 1) increase the magnitude of mean percent weight loss; 2)  
417 improve the overall success rate of participants achieving >5% weight loss; 3) monitor  
418 body composition to minimize loss of skeletal muscle mass; 4) calculate intervention  
419 cost; and 5) collaborate with other health professionals to track health markers, such as  
420 blood lipids, and address medical and psychological barriers to weight loss. In the long  
421 term, a large-scale, multi-center trial with a comparable control group is required to test  
422 general applicability and effectiveness of the program as a treatment option for obesity.

## 423 **Conclusions**

424 In conclusion, the study has shown the feasibility of the informed decision-  
425 making approach for dietary weight loss by utilizing two forms of quantitative visual  
426 feedback. One was the PF plot to monitor protein per energy and fiber per energy intake,  
427 and the other was the daily weight chart to monitor energy balance. Participants  
428 understood these visual weight management tools well. Participants significantly  
429 improved fiber density from the baseline FFQ to the final FFQ, and protein density  
430 significantly increased from the baseline 24-hour record at several time points in the  
431 study. The participants achieved a mean percent weight loss of  $-5.4 \pm 1.7\%$ , and half of  
432 them successfully lost  $\geq 5\%$  baseline weight. The dietary flexibility and self-selection of  
433 foods may have contributed to a low attrition rate. Future studies are warranted to  
434 improve success rate, magnitude of weight loss and long-term sustainability.

435

## 436 **References**

- 437 1. Popkin BM. Global nutrition dynamics: the world is shifting rapidly toward a diet  
438 linked with noncommunicable diseases. *Am J Clin Nutr.* 2006;84(2):289-98. Epub  
439 2006/08/10. doi: 10.1093/ajcn/84.1.289. PubMed PMID: 16895874.
- 440 2. Jensen MD, Ryan DH, Apovian CM, Ard JD, Comuzzie AG, Donato KA, et al.  
441 2013 AHA/ACC/TOS Guideline for the Management of Overweight and Obesity  
442 in Adults A Report of the American College of Cardiology/American Heart  
443 Association Task Force on Practice Guidelines and The Obesity Society. *Journal*  
444 *of the American College of Cardiology.* 2014;63(25):2985-3025. doi:  
445 10.1016/j.jacc.2013.11.004. PubMed PMID: WOS:000338435300004.
- 446 3. National Institute of Diabetes and Digestive and Kidney Diseases. Overweight &  
447 Obesity Statistics 2019. Available from: [https://www.niddk.nih.gov/health-](https://www.niddk.nih.gov/health-information/health-statistics/overweight-obesity)  
448 [information/health-statistics/overweight-obesity.](https://www.niddk.nih.gov/health-information/health-statistics/overweight-obesity)
- 449 4. Biener A, Cawley J, Meyerhoefer C. The Impact of Obesity on Medical Care  
450 Costs and Labor Market Outcomes in the US. *Clin Chem.* 2018;64(1):108-17.  
451 Epub 2017/11/04. doi: 10.1373/clinchem.2017.272450. PubMed PMID:  
452 29097513.
- 453 5. Look AHEAD Research Group. Cardiovascular effects of intensive lifestyle  
454 intervention in type 2 diabetes. *N Engl J Med.* 2013;369(2):145-54. Epub  
455 2013/06/26. doi: 10.1056/NEJMoa1212914. PubMed PMID: 23796131; PubMed  
456 Central PMCID: PMC3791615.
- 457 6. Finley CE, Barlow CE, Greenway FL, Rock CL, Rolls BJ, Blair SN. Retention  
458 rates and weight loss in a commercial weight loss program. *Int J Obes (Lond).*

- 459 2007;31(2):292-8. Epub 2006/06/07. doi: 10.1038/sj.ijo.0803395. PubMed PMID:  
460 16755283.
- 461 7. Mitchell C, Stuart RB. Effect of self-efficacy on dropout from obesity treatment. *J*  
462 *Consult Clin Psychol.* 1984;52(6):1100-1. Epub 1984/12/01. doi: 10.1037//0022-  
463 006x.52.6.1100. PubMed PMID: 6520280.
- 464 8. Volkmar FR, Stunkard AJ, Woolston J, Bailey RA. High attrition rates in  
465 commercial weight reduction programs. *Arch Intern Med.* 1981;141(4):426-8.  
466 Epub 1981/03/01. PubMed PMID: 7212881.
- 467 9. Gardner CD, Kiazand A, Alhassan S, Kim S, Stafford RS, Balise RR, et al.  
468 Comparison of the Atkins, Zone, Ornish, and LEARN diets for change in weight  
469 and related risk factors among overweight premenopausal women: the A TO Z  
470 Weight Loss Study: a randomized trial. *JAMA.* 2007;297(9):969-77. Epub  
471 2007/03/08. doi: 10.1001/jama.297.9.969. PubMed PMID: 17341711.
- 472 10. Dansinger ML, Gleason JA, Griffith JL, Selker HP, Schaefer EJ. Comparison of  
473 the Atkins, Ornish, Weight Watchers, and Zone diets for weight loss and heart  
474 disease risk reduction: a randomized trial. *JAMA.* 2005;293(1):43-53. Epub  
475 2005/01/06. doi: 10.1001/jama.293.1.43. PubMed PMID: 15632335.
- 476 11. Lowe MR, Miller-Kovach K, Phelan S. Weight-loss maintenance in overweight  
477 individuals one to five years following successful completion of a commercial  
478 weight loss program. *Int J Obes Relat Metab Disord.* 2001;25(3):325-31. Epub  
479 2001/04/25. doi: 10.1038/sj.ijo.0801521. PubMed PMID: 11319628.
- 480 12. Thomas JG, Raynor HA, Bond DS, Luke AK, Cardoso CC, Foster GD, et al.  
481 Weight loss in Weight Watchers Online with and without an activity tracking

- 482 device compared to control: A randomized trial. *Obesity* (Silver Spring).  
483 2017;25(6):1014-21. Epub 2017/04/25. doi: 10.1002/oby.21846. PubMed PMID:  
484 28437597.
- 485 13. Foster GD, Wyatt HR, Hill JO, Makris AP, Rosenbaum DL, Brill C, et al. Weight  
486 and metabolic outcomes after 2 years on a low-carbohydrate versus low-fat diet:  
487 a randomized trial. *Ann Intern Med*. 2010;153(3):147-57. Epub 2010/08/04. doi:  
488 10.7326/0003-4819-153-3-201008030-00005. PubMed PMID: 20679559;  
489 PubMed Central PMCID: PMCPMC2949959.
- 490 14. Hall KD, Kahan S. Maintenance of Lost Weight and Long-Term Management of  
491 Obesity. *Med Clin North Am*. 2018;102(1):183-97. Epub 2017/11/21. doi:  
492 10.1016/j.mcna.2017.08.012. PubMed PMID: 29156185; PubMed Central  
493 PMCID: PMCPMC5764193.
- 494 15. U.S. Department of Health and Human Services and U.S. Department of  
495 Agriculture. 2015–2020 Dietary Guidelines for Americans. Washington, DC:: US  
496 Dept of Health and Human Services; Dec 2015 [April 2020]. 8th  
497 Edition:[Available from: <http://health.gov/dietaryguidelines/2015/guidelines/>].
- 498 16. Raynor HA, Champagne CM. Position of the Academy of Nutrition and Dietetics:  
499 Interventions for the Treatment of Overweight and Obesity in Adults. *J Acad Nutr*  
500 *Diet*. 2016;116(1):129-47. Epub 2016/01/01. doi: 10.1016/j.jand.2015.10.031.  
501 PubMed PMID: 26718656.
- 502 17. Archundia Herrera MC, Chan CB. Narrative Review of New Methods for  
503 Assessing Food and Energy Intake. *Nutrients*. 2018;10(8). Epub 2018/08/15. doi:



- 504 10.3390/nu10081064. PubMed PMID: 30103401; PubMed Central PMCID:  
505 PMCPMC6116053.
- 506 18. Carels RA, Harper J, Konrad K. Qualitative perceptions and caloric estimations of  
507 healthy and unhealthy foods by behavioral weight loss participants. *Appetite*.  
508 2006;46(2):199-206. Epub 2006/02/10. doi: 10.1016/j.appet.2005.12.002.  
509 PubMed PMID: 16466830.
- 510 19. Cordeiro F, Epstein DA, Thomaz E, Bales E, Jagannathan AK, Abowd GD, et al.  
511 Barriers and Negative Nudges: Exploring Challenges in Food Journaling. *Proc*  
512 *SIGCHI Conf Hum Factor Comput Syst*. 2015;2015:1159-62. Epub 2016/02/20.  
513 doi: 10.1145/2702123.2702155. PubMed PMID: 26894233; PubMed Central  
514 PMCID: PMCPMC4755274.
- 515 20. Kong A, Beresford SAA, Alfano CM, Foster-Schubert KE, Neuhouser ML,  
516 Johnson DB, et al. Self-monitoring and eating-related behaviors are associated  
517 with 12-month weight loss in postmenopausal overweight-to-obese women. *J*  
518 *Acad Nutr Diet*. 2012;112(9):1428-35. Epub 2012/07/17. doi:  
519 10.1016/j.jand.2012.05.014. PubMed PMID: 22795495; PubMed Central PMCID:  
520 PMCPMC3432675.
- 521 21. Hwang KO, Ning J, Trickey AW, Sciamanna CN. Website Usage and Weight  
522 Loss in a Free Commercial Online Weight Loss Program: Retrospective Cohort  
523 Study. *Journal of Medical Internet Research*. 2013;15(1). doi: ARTN e11  
524 10.2196/jmir.2195. PubMed PMID: WOS:000315113200018.
- 525 22. Hoffer LJ, Bistrrian BR, Young VR, Blackburn GL, Matthews DE. Metabolic effects  
526 of very low calorie weight reduction diets. *J Clin Invest*. 1984;73(3):750-8. Epub

- 527 1984/03/01. doi: 10.1172/JCI111268. PubMed PMID: 6707202; PubMed Central  
528 PMCID: PMCPMC425077.
- 529 23. Wycherley TP, Moran LJ, Clifton PM, Noakes M, Brinkworth GD. Effects of  
530 energy-restricted high-protein, low-fat compared with standard-protein, low-fat  
531 diets: a meta-analysis of randomized controlled trials. *Am J Clin Nutr*.  
532 2012;96(6):1281-98. Epub 2012/10/26. doi: 10.3945/ajcn.112.044321. PubMed  
533 PMID: 23097268.
- 534 24. Ard JD, Lewis KH, Rothberg A, Auriemma A, Coburn SL, Cohen SS, et al.  
535 Effectiveness of a Total Meal Replacement Program (OPTIFAST Program) on  
536 Weight Loss: Results from the OPTIWIN Study. *Obesity (Silver Spring)*.  
537 2019;27(1):22-9. Epub 2018/11/14. doi: 10.1002/oby.22303. PubMed PMID:  
538 30421863; PubMed Central PMCID: PMCPMC6587830.
- 539 25. Franz MJ, VanWormer JJ, Crain AL, Boucher JL, Histon T, Caplan W, et al.  
540 Weight-loss outcomes: a systematic review and meta-analysis of weight-loss  
541 clinical trials with a minimum 1-year follow-up. *J Am Diet Assoc*.  
542 2007;107(10):1755-67. Epub 2007/10/02. doi: 10.1016/j.jada.2007.07.017.  
543 PubMed PMID: 17904936.
- 544 26. Marinilli Pinto A, Gorin AA, Raynor HA, Tate DF, Fava JL, Wing RR. Successful  
545 weight-loss maintenance in relation to method of weight loss. *Obesity (Silver  
546 Spring)*. 2008;16(11):2456-61. Epub 2008/08/23. doi: 10.1038/oby.2008.364.  
547 PubMed PMID: 18719680; PubMed Central PMCID: PMCPMC2666007.
- 548 27. Diabetes Prevention Program Research Group. The 10-year cost-effectiveness  
549 of lifestyle intervention or metformin for diabetes prevention: an intent-to-treat

- 550 analysis of the DPP/DPPOS. *Diabetes Care*. 2012;35(4):723-30. Epub  
551 2012/03/24. doi: 10.2337/dc11-1468. PubMed PMID: 22442395; PubMed Central  
552 PMCID: PMCPMC3308273.
- 553 28. Jones BJ, Bloom SR. The New Era of Drug Therapy for Obesity: The Evidence  
554 and the Expectations. *Drugs*. 2015;75(9):935-45. Epub 2015/05/20. doi:  
555 10.1007/s40265-015-0410-1. PubMed PMID: 25985865; PubMed Central  
556 PMCID: PMCPMC4464860.
- 557 29. Schauer PR, Bhatt DL, Kirwan JP, Wolski K, Brethauer SA, Navaneethan SD, et  
558 al. Bariatric Surgery versus Intensive Medical Therapy for Diabetes-3-Year  
559 Outcomes. *New Engl J Med*. 2014;370(21):2002-13. doi:  
560 10.1056/NEJMoa1401329. PubMed PMID: WOS:000336125500008.
- 561 30. Doble B, Wordsworth S, Rogers CA, Welbourn R, Byrne J, Blazeby JM, et al.  
562 What Are the Real Procedural Costs of Bariatric Surgery? A Systematic  
563 Literature Review of Published Cost Analyses. *Obes Surg*. 2017;27(8):2179-92.  
564 Epub 2017/05/28. doi: 10.1007/s11695-017-2749-8. PubMed PMID: 28550438;  
565 PubMed Central PMCID: PMCPMC5509820.
- 566 31. Pratt NS, Ellison BD, Benjamin AS, Nakamura MT. Improvements in recall and  
567 food choices using a graphical method to deliver information of select nutrients.  
568 *Nutrition Research*. 2016;36(1):44-56. doi: 10.1016/j.nutres.2015.10.009.  
569 PubMed PMID: WOS:000368755600006.
- 570 32. Johns DJ, Hartmann-Boyce J, Jebb SA, Aveyard P, Behavioural Weight  
571 Management Review G. Diet or exercise interventions vs combined behavioral  
572 weight management programs: a systematic review and meta-analysis of direct

- 573 comparisons. *J Acad Nutr Diet*. 2014;114(10):1557-68. Epub 2014/09/27. doi:  
574 10.1016/j.jand.2014.07.005. PubMed PMID: 25257365; PubMed Central PMCID:  
575 PMC4180002.
- 576 33. Borek AJ, Abraham C, Greaves CJ, Tarrant M. Group-Based Diet and Physical  
577 Activity Weight-Loss Interventions: A Systematic Review and Meta-Analysis of  
578 Randomised Controlled Trials. *Appl Psychol Health Well Being*. 2018;10(1):62-  
579 86. Epub 2018/02/16. doi: 10.1111/aphw.12121. PubMed PMID: 29446541.
- 580 34. Atkinson RL, Dietz WH, Foreyt JP, Goodwin NJ, Hill JO, Hirsch J, et al. Very-  
581 Low-Calorie Diets. *Jama-Journal of the American Medical Association*.  
582 1993;270(8):967-74. doi: DOI 10.1001/jama.1993.03510080071034. PubMed  
583 PMID: WOS:A1993LT56700028.
- 584 35. Larsen TM, Dalskov SM, van Baak M, Jebb SA, Papadaki A, Pfeiffer AFH, et al.  
585 Diets with High or Low Protein Content and Glycemic Index for Weight-Loss  
586 Maintenance. *New England Journal of Medicine*. 2010;363(22):2102-13. doi: DOI  
587 10.1056/NEJMoa1007137. PubMed PMID: WOS:000284587800005.
- 588 36. Liu SM, Willett WC, Manson JE, Hu FB, Rosner B, Colditz G. Relation between  
589 changes in intakes of dietary fiber and grain products and changes in weight and  
590 development of obesity among middle-aged women. *American Journal of Clinical  
591 Nutrition*. 2003;78(5):920-7. PubMed PMID: WOS:000186146500006.
- 592 37. Koh-Banerjee P, Franz MV, Sampson L, Liu SM, Jacobs DR, Spiegelman D, et  
593 al. Changes in whole-grain, bran, and cereal fiber consumption in relation to 8-y  
594 weight gain among men. *American Journal of Clinical Nutrition*. 2004;80(5):1237-  
595 45. PubMed PMID: WOS:000225036000019.

- 596 38. Nordmann AJ, Nordmann A, Briel M, Keller U, Yancy WS, Jr., Brehm BJ, et al.  
597 Effects of low-carbohydrate vs low-fat diets on weight loss and cardiovascular  
598 risk factors: a meta-analysis of randomized controlled trials. *Arch Intern Med*.  
599 2006;166(3):285-93. Epub 2006/02/16. doi: 10.1001/archinte.166.3.285. PubMed  
600 PMID: 16476868.
- 601 39. Stern L, Iqbal N, Seshadri P, Chicano KL, Daily DA, McGrory J, et al. The effects  
602 of low-carbohydrate versus conventional weight loss diets in severely obese  
603 adults: one-year follow-up of a randomized trial. *Ann Intern Med*.  
604 2004;140(10):778-85. Epub 2004/05/19. doi: 10.7326/0003-4819-140-10-  
605 200405180-00007. PubMed PMID: 15148064.
- 606 40. Foster GD, Wyatt HR, Hill JO, McGuckin BG, Brill C, Mohammed BS, et al. A  
607 randomized trial of a low-carbohydrate diet for obesity. *N Engl J Med*.  
608 2003;348(21):2082-90. Epub 2003/05/23. doi: 10.1056/NEJMoa022207. PubMed  
609 PMID: 12761365.
- 610 41. Mulligan AA, Luben RN, Bhaniani A, Parry-Smith DJ, O'Connor L, Khawaja AP,  
611 et al. A new tool for converting food frequency questionnaire data into nutrient  
612 and food group values: FETA research methods and availability. *Bmj Open*.  
613 2014;4(3). doi: 10.1136/bmjopen-2013-004503. PubMed PMID:  
614 WOS:000333921300056.
- 615 42. Blackburn G. Effect of Degree of Weight-Loss Benefits. *Obesity Research*.  
616 1995;3:S211-S6. doi: DOI 10.1002/j.1550-8528.1995.tb00466.x. PubMed PMID:  
617 WOS:A1995RZ53500018.

- 618 43. Van Dorsten B, Lindley EM. Cognitive and behavioral approaches in the  
619 treatment of obesity. *Med Clin North Am.* 2011;95(5):971-88. Epub 2011/08/23.  
620 doi: 10.1016/j.mcna.2011.06.008. PubMed PMID: 21855703.
- 621 44. Brown JD, Buscemi J, Milsom V, Malcolm R, O'Neil PM. Effects on  
622 cardiovascular risk factors of weight losses limited to 5-10 %. *Translational  
623 Behavioral Medicine.* 2016;6(3):339-46. doi: 10.1007/s13142-015-0353-9.  
624 PubMed PMID: WOS:000385261500002.
- 625 45. Bertz F, Pacanowski CR, Levitsky DA. Frequent Self-Weighing with Electronic  
626 Graphic Feedback to Prevent Age-Related Weight Gain in Young Adults. *Obesity  
627 (Silver Spring).* 2015;23(10):2009-14. Epub 2015/09/29. doi: 10.1002/oby.21211.  
628 PubMed PMID: 26414563; PubMed Central PMCID: PMC4751025.

629  
630

## 631 **Supporting information**

632 **S1 Appendix. iDip educational session topics**

633 **S2 Appendix. Food Frequency Questionnaire**

634 **S3 Appendix. Exit survey outcomes**

635 **S4 Appendix. TREND checklist**

636 **S5 Appendix. Clinical trial protocol**

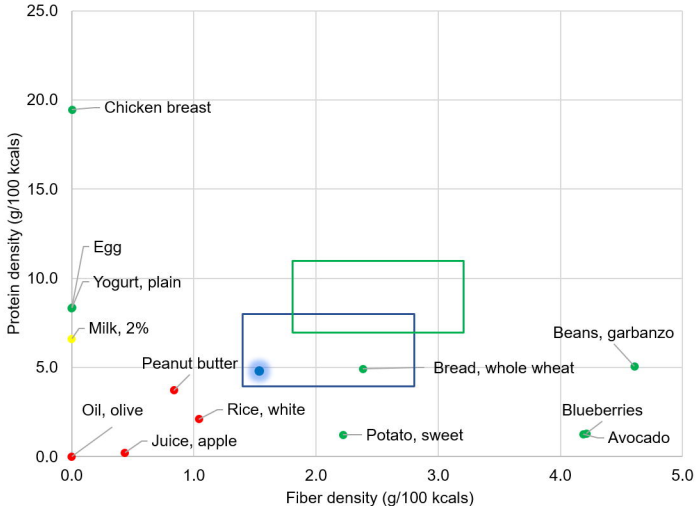

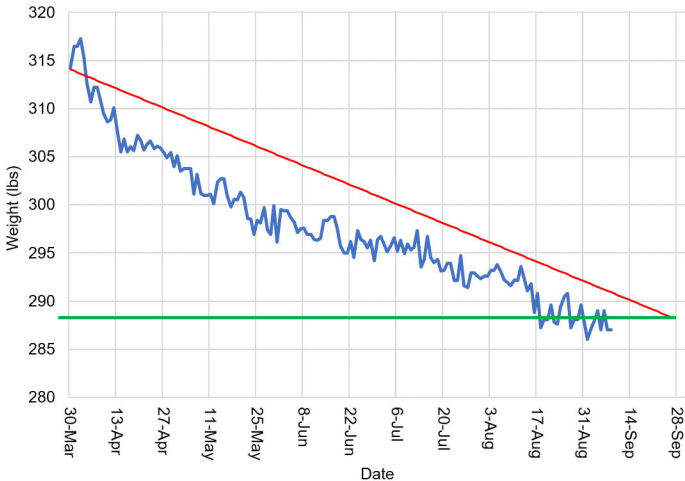



## Enrollment

Assessed for eligibility (n= 36)

Excluded (n= 22)  
- Not meeting inclusion criteria (n= 21)  
- Declined to participate (n= 1)

Non-Randomized (n=14)

## Allocation

Allocated to intervention (n= 14)  
- Received allocated intervention (n= 12)

Discontinued intervention (n=2)  
- Unsatisfying weight loss (n=1)  
- Busy schedule (n=1)

## Follow-Up

Lost to follow-up (n=6)  
- Declined to participate (n=1)

## Analysis

Analysed participants who completed  
intervention (n=12)

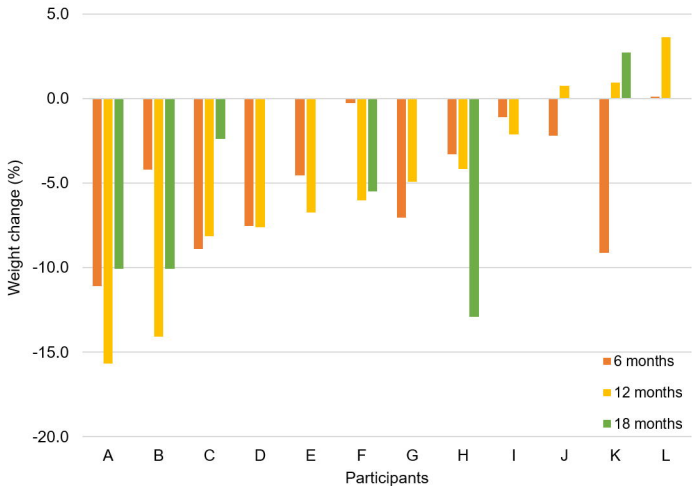

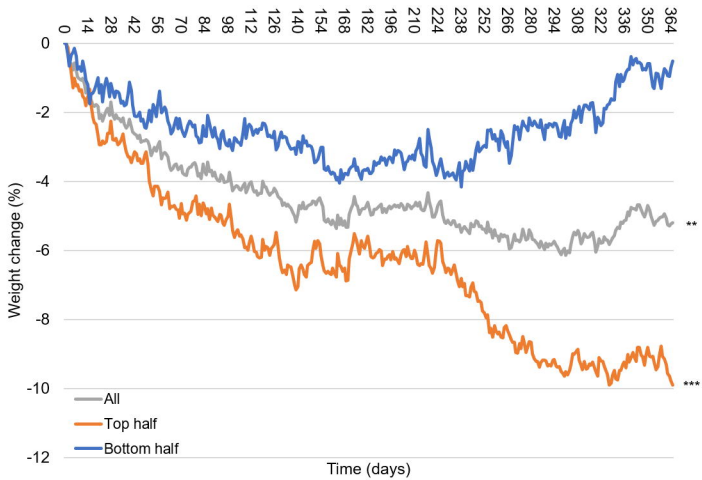

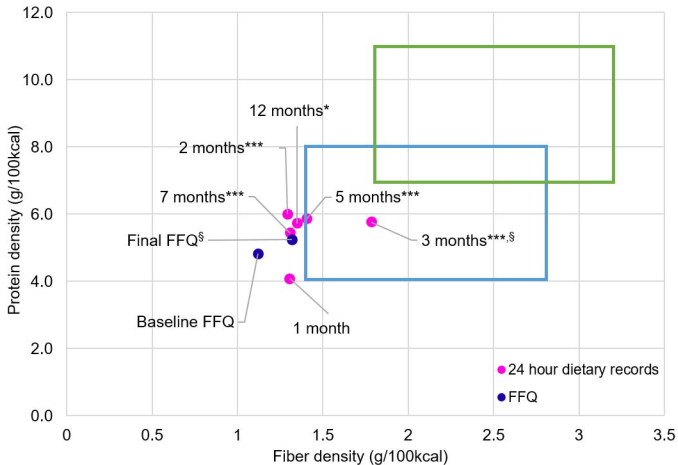

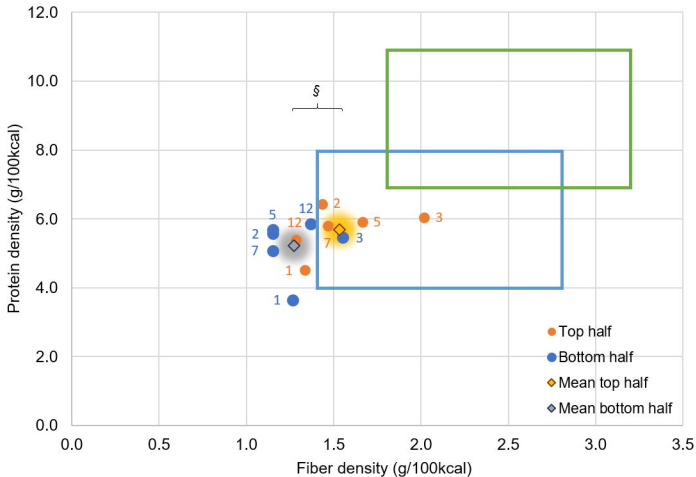

Source: https://medrxiv.org/content/10.1101/2021.05.21.21257479v1.full.pdf
