# Supplementary material for: A feasibility study to test a novel approach to dietary weight loss with a focus on assisting informed decision making in food selection
Source: medRxiv preprint, doi:10.1101/2021.05.21.21257479, version 3 (2022-05-20)
Supplement: Supplemental Appendix 1 [file 257479_file11.pdf]

**S1 Table. iDip educational session topics**

| Dietary Improvement Session Topics |                                                                    |
|------------------------------------|--------------------------------------------------------------------|
| <b>1</b>                           | FFQ, starting weight loss                                          |
| <b>2</b>                           | Weight monitoring                                                  |
| <b>3</b>                           | 24-hour dietary record 1                                           |
| <b>4</b>                           | Individual advising 1                                              |
| <b>5</b>                           | Protein 1                                                          |
| <b>6</b>                           | Establishing routine and 24 hour dietary record 2                  |
| <b>7</b>                           | Fiber 1                                                            |
| <b>8</b>                           | Individual advising 2                                              |
| <b>9</b>                           | Physical activity                                                  |
| <b>10</b>                          | Protein 2                                                          |
| <b>11</b>                          | Fiber 2                                                            |
| <b>12</b>                          | Trouble shooting for slowing down                                  |
| <b>13</b>                          | Peer experience sharing                                            |
| <b>14</b>                          | Weight maintenance: Difference between weight loss and maintenance |
| <b>15</b>                          | Weight maintenance: Building a Healthy Plate                       |
| <b>16</b>                          | Weight maintenance: Hidden Kcal Contributors and Diet Foods        |
| <b>17</b>                          | Barriers to Healthy Eating                                         |
| <b>18</b>                          | Fats                                                               |
| <b>19</b>                          | Individual advising 3                                              |
| <b>20</b>                          | Salt and Potassium                                                 |
| <b>21</b>                          | Eat the Rainbow: The Importance of Vitamins and Minerals           |
| <b>22</b>                          | Final review                                                       |
