# Supplementary material for: A feasibility study to test a novel approach to dietary weight loss with a focus on assisting informed decision making in food selection
Source: bioRxiv or medRxiv preprint supplement (doi:10.1101/2021.05.21.21257479), 2022-05-20
Supplement: Supplementary file [file media-2.pdf]

## **FOOD FREQUENCY QUESTIONNAIRE**

**This questionnaire asks for some background information about you, especially about what you eat.**

**Please answer every question. If you are uncertain about how to answer a question then do the best you can, but please do not leave a question blank.**

## 1. YOUR DIET LAST YEAR

For each food there is an amount shown, either a "medium serving" or a common household unit such as a slice or teaspoon. Please put a tick (✓) in the box to indicate how often, **on average**, you have eaten the specified amount of each food **during the past year**.

### EXAMPLES:

For white bread the amount is one slice, so if you ate 4 or 5 slices a day, you should put a tick in the column headed "4-5 per day".

| FOODS AND AMOUNTS                                    | AVERAGE USE LAST YEAR               |                     |                   |                    |                    |                  |                   |                   |                  |
|------------------------------------------------------|-------------------------------------|---------------------|-------------------|--------------------|--------------------|------------------|-------------------|-------------------|------------------|
| BREAD AND SAVOURY BISCUITS<br>(one slice or biscuit) | Never or<br>less than<br>once/month | 1-3<br>per<br>month | Once<br>a<br>week | 2-4<br>per<br>week | 5-6<br>per<br>week | Once<br>a<br>day | 2-3<br>per<br>day | 4-5<br>per<br>day | 6+<br>per<br>day |
| White bread and rolls                                |                                     |                     |                   |                    |                    |                  |                   | ✓                 |                  |

For chips, the amount is a "medium serving", so if you had a helping of chips twice a week you should put a tick in the column headed "2-4 per week".

| FOODS AND AMOUNTS                            | AVERAGE USE LAST YEAR               |                     |                   |                    |                    |                  |                   |                   |                  |
|----------------------------------------------|-------------------------------------|---------------------|-------------------|--------------------|--------------------|------------------|-------------------|-------------------|------------------|
| POTATOES, RICE AND PASTA<br>(medium serving) | Never or<br>less than<br>once/month | 1-3<br>per<br>month | Once<br>a<br>week | 2-4<br>per<br>week | 5-6<br>per<br>week | Once<br>a<br>day | 2-3<br>per<br>day | 4-5<br>per<br>day | 6+<br>per<br>day |
| Chips                                        |                                     |                     |                   | ✓                  |                    |                  |                   |                   |                  |

For very seasonal fruits such as strawberries and raspberries you should estimate your average use when the fruits are in season, so if you ate strawberries or raspberries about once a week when they were in season you should put a tick in the column headed "once a week".

| FOODS AND AMOUNTS                     | AVERAGE USE LAST YEAR               |                     |                   |                    |                    |                  |                   |                   |                  |
|---------------------------------------|-------------------------------------|---------------------|-------------------|--------------------|--------------------|------------------|-------------------|-------------------|------------------|
| FRUIT<br>(1 fruit or medium serving)  | Never or<br>less than<br>once/month | 1-3<br>per<br>month | Once<br>a<br>week | 2-4<br>per<br>week | 5-6<br>per<br>week | Once<br>a<br>day | 2-3<br>per<br>day | 4-5<br>per<br>day | 6+<br>per<br>day |
| Strawberries, raspberries, kiwi fruit |                                     |                     | ✓                 |                    |                    |                  |                   |                   |                  |

**PLEASE PUT A TICK (✓) ON EVERY LINE**

[illegible]

**PLEASE PUT A TICK (✓) ON EVERY LINE**

[illegible]

**PLEASE PUT A TICK (✓) ON EVERY LINE**

[illegible]

**PLEASE PUT A TICK (✓) ON EVERY LINE**

[illegible]

**PLEASE PUT A TICK (✓) ON EVERY LINE**

[illegible]



## YOUR DIET LAST YEAR, continued

2. Are there any **OTHER** foods which you ate more than once a week? Yes ☐ No ☐

If yes, please list below

| Food                 | Usual serving size   | Number of times eaten each week |
|----------------------|----------------------|---------------------------------|
| <input type="text"/> | <input type="text"/> | <input type="text"/>            |
| <input type="text"/> | <input type="text"/> | <input type="text"/>            |
| <input type="text"/> | <input type="text"/> | <input type="text"/>            |
| <input type="text"/> | <input type="text"/> | <input type="text"/>            |
| <input type="text"/> | <input type="text"/> | <input type="text"/>            |
| <input type="text"/> | <input type="text"/> | <input type="text"/>            |

3. What type of milk did you most often use?

Select one only

Full cream, silver ☐

Semi-skimmed, red/white ☐

Skimmed/blue ☐

Channel Islands, gold ☐

Dried milk ☐

Soya ☐

Other, specify

None ☐

4. How much milk did you drink each day, including milk with tea, coffee, cereals etc?

None ☐

Three quarters of a pint ☐

Quarter of a pint ☐

One pint ☐

Half a pint ☐

More than one pint ☐

5. Did you usually eat breakfast cereal (excluding porridge and Ready Brek mentioned earlier)?

Yes ☐ No ☐

If yes, which brand and type of breakfast cereal, including muesli, did you usually eat?

List the one or two types most often used

Brand e.g. Kellogg's

Type e.g. cornflakes

6. What kind of fat did you most often use for frying, roasting, grilling etc?

Select one only

Butter ☐

Solid vegetable fat ☐

Lard/dripping ☐

Margarine ☐

Vegetable oil ☐

None ☐

If you used vegetable oil, please give type eg. corn, sunflower

7. What kind of fat did you most often use for baking cakes etc?

Select one only

Butter ☐

Solid vegetable fat ☐

Lard/dripping ☐

Margarine ☐

Vegetable oil ☐

None ☐

If you used margarine, please give name or type eg. Flora, Stork



8. How often did you eat food that was fried at home?  
 Daily ☐ 1-3 times a week ☐ 4-6 times a week ☐  
 Less than once a week ☐ Never ☐
9. How often did you eat fried food away from home?  
 Daily ☐ 1-3 times a week ☐ 4-6 times a week ☐  
 Less than once a week ☐ Never ☐
10. What did you do with the visible fat on your meat?  
 Ate most of the fat ☐ Ate as little as possible ☐  
 Ate some of the fat ☐ Did not eat meat ☐
11. How often did you eat grilled or roast meat?   times a week
12. How well cooked did you usually have grilled or roast meat?  
 Well done /dark brown ☐ Lightly cooked/rare ☐  
 Medium ☐ Did not eat meat ☐
13. How often did you add salt to food while cooking?  
 Always ☐ Rarely ☐  
 Usually ☐ Never ☐  
 Sometimes ☐
14. How often did you add salt to any food at the table?  
 Always ☐ Rarely ☐  
 Usually ☐ Never ☐  
 Sometimes ☐
15. Did you regularly use a salt substitute (eg LoSalt)? Yes ☐ No ☐  
 If yes, which brand?
16. During the course of last year, on average, how many times a week did you eat the following foods?

**Food type**

**Times/week**

**Portion size**

Vegetables (not including potatoes)

 

medium serving

Salads

 

medium serving

Fruit and fruit products (not including fruit juice)

 

medium serving or 1 fruit

Fish and fish products

 

medium serving

Meat, meat products and meat dishes  
(including bacon, ham and chicken)

 

medium serving

17. Have you taken any vitamins, minerals, fish oils, fibre or other food supplements during the past year? Yes ☐ No ☐ Don't know ☐

If **yes**, please complete the table below. If you have taken more than 5 types of supplement please put the most frequently consumed brands first.

| Vitamin supplements                                                       | <b>Average frequency</b><br>Tick <b>one</b> box per line to show how often on average you consumed supplements |                                 |               |             |              |              |            |             |             |            |
|---------------------------------------------------------------------------|----------------------------------------------------------------------------------------------------------------|---------------------------------|---------------|-------------|--------------|--------------|------------|-------------|-------------|------------|
| <b>Name and brand</b><br>Please list full name, <b>brand</b> and strength | <b>Dose</b><br>Please state number of pills, capsules or teaspoons consumed                                    | Never or less than once a month | 1-3 per month | Once a week | 2-4 per week | 5-6 per week | Once a day | 2-3 per day | 4-5 per day | 6+ per day |
| _____<br>_____<br>_____                                                   |                                                                                                                |                                 |               |             |              |              |            |             |             |            |
| _____<br>_____<br>_____                                                   |                                                                                                                |                                 |               |             |              |              |            |             |             |            |
| _____<br>_____<br>_____                                                   |                                                                                                                |                                 |               |             |              |              |            |             |             |            |
| _____<br>_____<br>_____                                                   |                                                                                                                |                                 |               |             |              |              |            |             |             |            |
| _____<br>_____<br>_____                                                   |                                                                                                                |                                 |               |             |              |              |            |             |             |            |
| _____<br>_____<br>_____                                                   |                                                                                                                |                                 |               |             |              |              |            |             |             |            |

*Thank you for your help*
